# Supplementary material
Source: MDPI journal article supplement (https://www.mdpi.com/1996-1073/16/11/4485)
Supplement: s1 [file s1]

Table S3: Listed results of the refined parameters extracted from the Rietveld refinement of the cathode samples.

| Phase                                                                           | Refined Parameter | Fresh SoC 0% | Fresh SoC 100% | Cycled SoC 0% | Cycled SoC 100% |
|---------------------------------------------------------------------------------|-------------------|--------------|----------------|---------------|-----------------|
| <b>Li<sub>1-x</sub>Mn<sub>2</sub>O<sub>4</sub></b>                              | a(Å)              | 8.21730(5)   | 8.17208(5)     | 8.20534(6)    | 8.14348(5)      |
|                                                                                 | Phase_Fraction    | 0.264(4)     | 0.243(4)       | 0.230(3)      | 0.248(4)        |
|                                                                                 | Weight_Fraction   | 0.869(2)     | 0.874(2)       | 0.868(2)      | 0.874(2)        |
|                                                                                 | Uiso (all atoms)  | 0.0180(2)    | 0.0188(2)      | 0.0166(2)     | 0.0158(2)       |
|                                                                                 | O1_x              | 0.26332(8)   | 0.26335(9)     | 0.26329(8)    | 0.26343(9)      |
| <b>Graphite</b>                                                                 | a(Å)              | 2.463(2)     | 2.46(3)        | 2.459(2)      | 2.463(3)        |
|                                                                                 | c(Å)              | 6.7181(8)    | 6.722(7)       | 6.7161(7)     | 6.7149(7)       |
|                                                                                 | Phase_Fraction    | 0.711(5)     | 0.708(4)       | 0.753(4)      | 0.701(5)        |
|                                                                                 | Weight_Fraction   | 0.078(2)     | 0.086(2)       | 0.095(2)      | 0.084(2)        |
| <b>LiNaSO<sub>4</sub></b>                                                       | a(Å)              | 7.631(4)     | 7.636(5)       | 7.630(3)      | 7.626(4)        |
|                                                                                 | c(Å)              | 9.866(4)     | 9.875(5)       | 9.863(3)      | 9.867(5)        |
|                                                                                 | Phase_Fraction    | 0.0113(6)    | 0.0067(6)      | 0.016(5)      | 0.0077(6)       |
|                                                                                 | Weight_Fraction   | 0.0194(9)    | 0.013(1)       | 0.031(1)      | 0.015(2)        |
| <b>Li<sub>2</sub>SO<sub>4</sub>(H<sub>2</sub>O)</b>                             | a(Å)              | 5.45(3)      | 5.458(6)       | -             | 5.451(6)        |
|                                                                                 | b(Å)              | 4.868(5)     | 4.877(2)       | -             | 4.869(2)        |
|                                                                                 | c(Å)              | 8.19(6)      | 8.18(2)        | -             | 8.18(2)         |
|                                                                                 | Phase_Fraction    | 0.008(2)     | 0.042(2)       | -             | 0.044(2)        |
|                                                                                 | Weight_Fraction   | 0.0045(8)    | 0.027(2)       | -             | 0.028(2)        |
| <b>Na<sub>3</sub>Li(SO<sub>4</sub>)<sub>2</sub>(H<sub>2</sub>O)<sub>6</sub></b> | a(Å)              | 8.447(3)     | -              | 8.449(8)      | -               |
|                                                                                 | c(Å)              | 30.261(7)    | -              | 30.29(3)      | -               |
|                                                                                 | Phase_Fraction    | 0.0056(3)    | -              | 0.0010(2)     | -               |
|                                                                                 | Weight_Fraction   | 0.029(2)     | -              | 0.006(9)      | -               |
| <b>Rwp (%)</b>                                                                  |                   | 7.00         | 7.15           | 6.83          | 7.15            |
