# Supplementary material
Source: MDPI journal article supplement (https://www.mdpi.com/1996-1073/16/11/4485)
Supplement: s1 [file s1]

Table S1: Listed results of the refined parameters extracted from the Rietveld refinement of the anode samples.

| Phase                                                                             | Refined Parameter | Fresh SoC 0% | Fresh SoC 100% | Cycled SoC 0% | Cycled SoC 100% |
|-----------------------------------------------------------------------------------|-------------------|--------------|----------------|---------------|-----------------|
| NaTi <sub>2</sub> (PO <sub>4</sub> ) <sub>3</sub>                                 | a(Å)              | 8.4881(3)    | 8.4807(3)      | 8.4774(3)     | 8.4791(3)       |
|                                                                                   | c(Å)              | 21.8131(5)   | 21.7870(5)     | 21.7691(4)    | 21.7771(4)      |
|                                                                                   | Phase_Fraction    | 0.197(5)     | 0.110(2)       | 0.144(2)      | 0.113(2)        |
|                                                                                   | Weight_Fraction   | 0.864(2)     | 0.765(3)       | 0.868(2)      | 0.735(2)        |
|                                                                                   | Uiso (all atoms)  | 0.0107(3)    | 0.0088(3)      | 0.0088(3)     | 0.0092(2)       |
|                                                                                   | Ti2_z             | 0.14554(6)   | 0.14562(6)     | 0.14544(6)    | 0.14542(6)      |
|                                                                                   | P1_x              | 0.2864(2)    | 0.2864(2)      | 0.2867(2)     | 0.2869(2)       |
|                                                                                   | O1_x              | 0.0259(4)    | 0.0269(4)      | 0.0265(4)     | 0.0240(4)       |
|                                                                                   | O1_y              | 0.1945(3)    | 0.1950(3)      | 0.1948(3)     | 0.1935(3)       |
|                                                                                   | O1_z              | 0.1909(2)    | 0.1903(2)      | 0.1908(2)     | 0.1909(2)       |
|                                                                                   | O2_x              | 0.1910(3)    | 0.1913(3)      | 0.1913(3)     | 0.1900(3)       |
|                                                                                   | O2_y              | 0.1611(3)    | 0.1615(3)      | 0.1613(3)     | 0.1606(3)       |
|                                                                                   | O2_z              | 0.0891(2)    | 0.0884(2)      | 0.0887(2)     | 0.0884(2)       |
| Graphite                                                                          | a(Å)              | 2.462(6)     | 2.459(2)       | 2.458(2)      | 2.458(2)        |
|                                                                                   | c(Å)              | 6.701(2)     | 6.7095(6)      | 6.7061(6)     | 6.7081(6)       |
|                                                                                   | Phase_Fraction    | 0.746(6)     | 0.693(4)       | 0.813(3)      | 0.716(4)        |
|                                                                                   | Weight_Fraction   | 0.065(2)     | 0.095(2)       | 0.097(2)      | 0.092(2)        |
| Na <sub>3</sub> Li(SO <sub>4</sub> ) <sub>2</sub> (H <sub>2</sub> O) <sub>6</sub> | a(Å)              | 8.456(2)     | -              | -             | -               |
|                                                                                   | c(Å)              | 30.280(5)    | -              | -             | -               |
|                                                                                   | Phase_Fraction    | 0.0109(5)    | -              | -             | -               |
|                                                                                   | Weight_Fraction   | 0.044(2)     | -              | -             | -               |
| Li <sub>3</sub> PO <sub>4</sub>                                                   | a(Å)              | -            | 6.1494(8)      | -             | 6.148(2)        |
|                                                                                   | b(Å)              | -            | 5.2427(7)      | -             | 5.2422(8)       |
|                                                                                   | c(Å)              | -            | 4.8825(5)      | -             | 4.8851(7)       |
|                                                                                   | Phase_Fraction    | -            | 0.165(4)       | -             | 0.110(4)        |
|                                                                                   | Weight_Fraction   | -            | 0.110(3)       | -             | 0.068(2)        |
|                                                                                   | Uiso (all atoms)  | -            | 0.011(3)       | -             | 0.014(3)        |
|                                                                                   | P1_y              | -            | 0.161(3)       | -             | 0.168(4)        |
|                                                                                   | P1_z              | -            | 0.115(2)       | -             | 0.063(4)        |
|                                                                                   | O1_x              | -            | 0.221(2)       | -             | 0.207(4)        |
|                                                                                   | O1_y              | -            | 0.316(3)       | -             | 0.300(4)        |
|                                                                                   | O1_z              | -            | 0.062(4)       | -             | 0.120(5)        |
|                                                                                   | O2_y              | -            | 0.868(4)       | -             | 0.894(7)        |
|                                                                                   | O2_z              | -            | 0.052(5)       | -             | 0.128(9)        |
|                                                                                   | O3_y              | -            | 0.183(6)       | -             | 0.185(7)        |
|                                                                                   | O3_z              | -            | 0.718(3)       | -             | 0.658(5)        |
|                                                                                   | Li1_x             | -            | 0.168(6)       | -             | 0.29(1)         |
|                                                                                   | Li1_y             | -            | 0.370(9)       | -             | 0.35(2)         |
|                                                                                   | Li1_z             | -            | 0.60(2)        | -             | 0.73(2)         |
|                                                                                   | Li2_y             | -            | 0.83(2)        | -             | 0.81(2)         |
|                                                                                   | Li2_z             | -            | 0.63(2)        | -             | 0.68(2)         |
| TiO <sub>2</sub> (Anatase)                                                        | a(Å)              | 3.7874(5)    | 3.7824(5)      | 3.7812(4)     | 3.7824(4)       |
|                                                                                   | c(Å)              | 9.535(3)     | 9.519(3)       | 9.514(3)      | 9.516(2)        |
|                                                                                   | Phase_Fraction    | 0.046(2)     | 0.0324(8)      | 0.043(1)      | 0.0364(8)       |
|                                                                                   | Weight_Fraction   | 0.027(1)     | 0.030(1)       | 0.035(1)      | 0.031(1)        |
| Na <sub>2</sub> SO <sub>4</sub>                                                   | a(Å)              | -            | -              | -             | 9.8186(8)       |
|                                                                                   | b(Å)              | -            | -              | -             | 12.2987(9)      |
|                                                                                   | c(Å)              | -            | -              | -             | 5.8579(5)       |
|                                                                                   | Phase_Fraction    | -            | -              | -             | 0.0244(5)       |
|                                                                                   | Weight_Fraction   | -            | -              | -             | 0.074(1)        |
| Rwp                                                                               |                   | 5.79         | 4.64           | 5.54          | 5.27            |
