# Supplementary material
Source: MDPI journal article supplement (https://www.mdpi.com/1996-1073/16/11/4485)
Supplement: s1 [file s1]

Archive with 13 entries (13 files):
- Figure_S1.pdf
- Figure_S10.pdf
- Figure_S2.pdf
- Figure_S3.pdf
- Figure_S4.pdf
- Figure_S5.pdf
- Figure_S6.pdf
- Figure_S7.pdf
- Figure_S8.pdf
- Figure_S9.pdf
- Table_S1.pdf
- Table_S2.pdf
- Table_S3.pdf
