# Supplementary material
Source: MDPI journal article supplement (https://www.mdpi.com/1996-1073/16/11/4485)
Supplement: s1 [file s1 › Table_S2.pdf]

Table S2: Parameters of the utilized instrument resolution function for Rietveld refinement

| $I(K_{\alpha 1})/I(K_{\alpha 2})$ | Zero Shift | Polarization | U      | V      | W     | X     | Y     | $S_{H/L}$ |
|-----------------------------------|------------|--------------|--------|--------|-------|-------|-------|-----------|
| 0.4683                            | 0.01°      | 1.0          | 14.873 | -1.568 | 1.053 | 1.136 | 2.034 | 0.03293   |
