# Supplementary material
Source: MDPI journal article supplement (https://www.mdpi.com/1996-1073/16/11/4485)

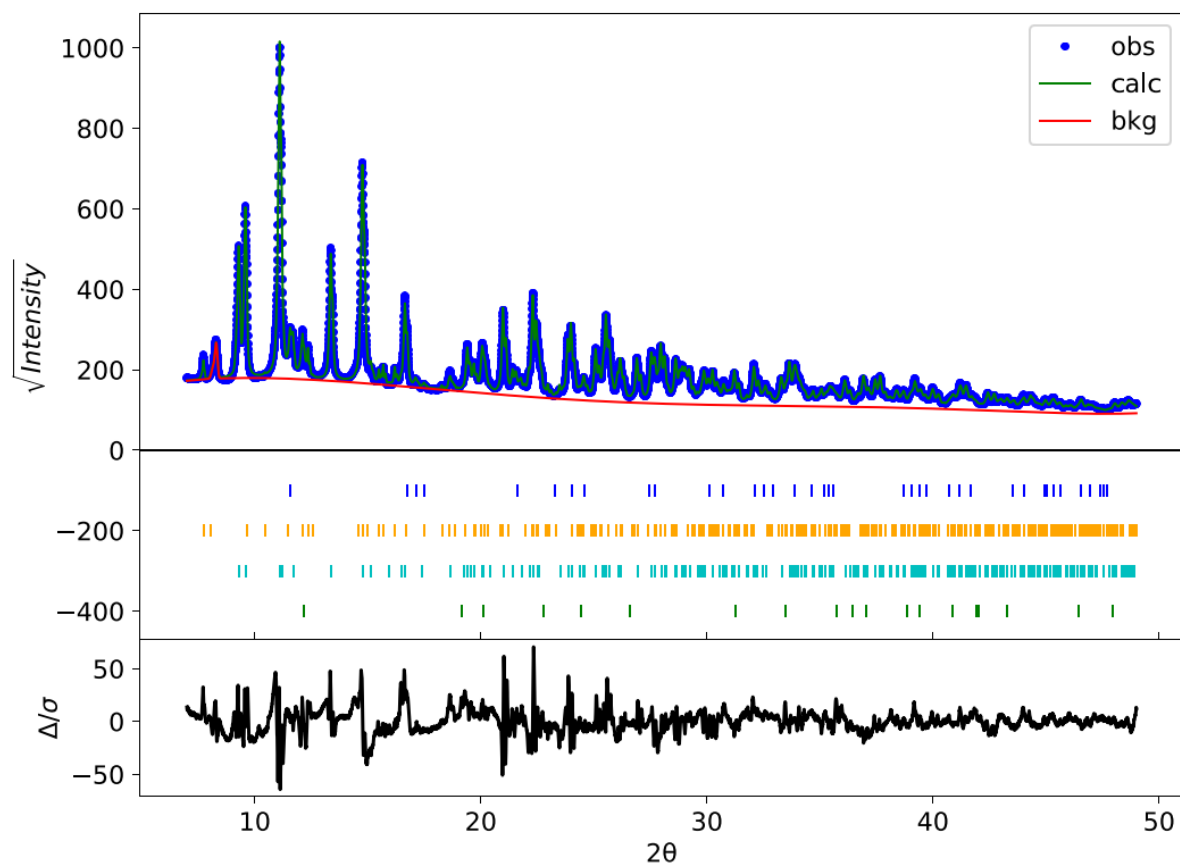

Figure S2. Rietveld Fits fresh anode 0 % SoC.

Supplement: s1 [file s1]

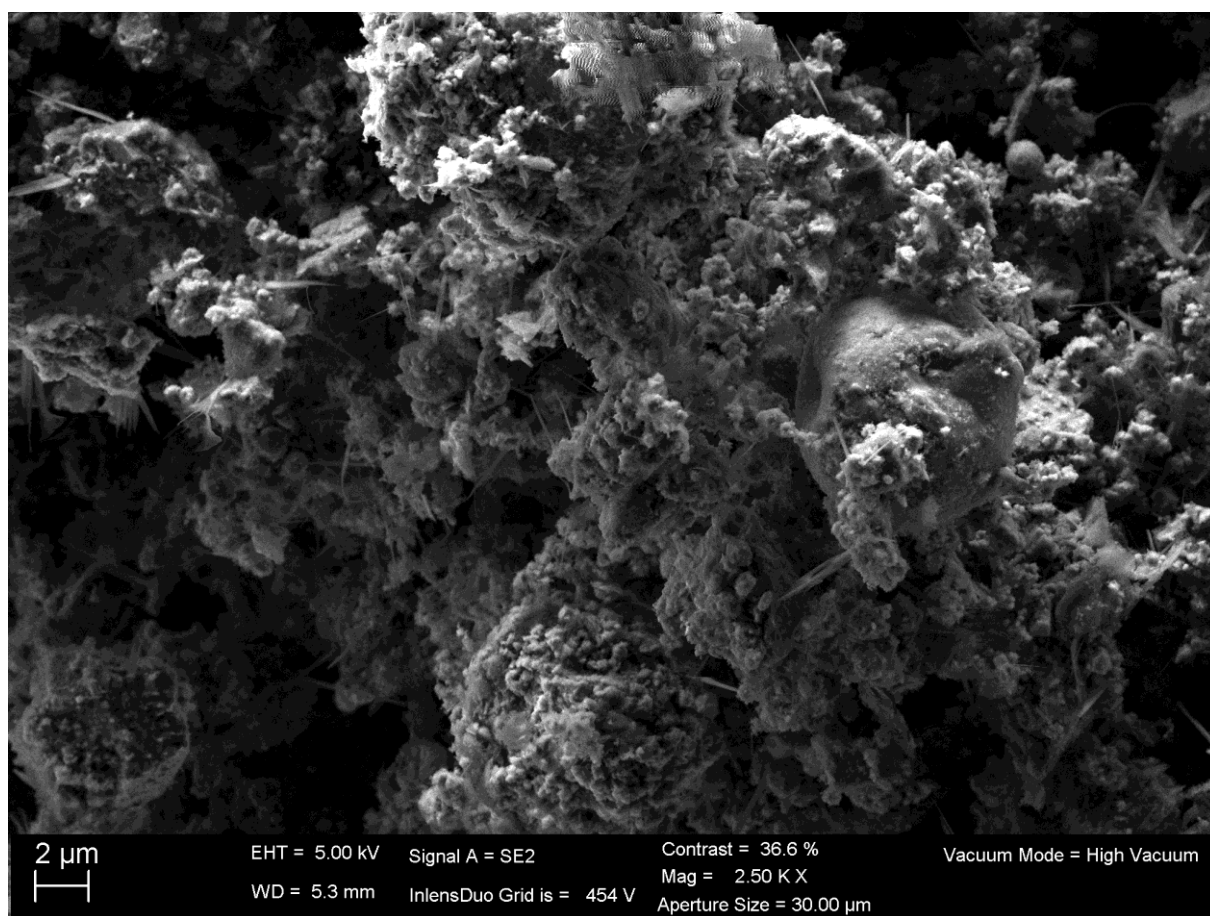

**Figure S9.** SEM-picture of sodium titanium phosphate.

Supplement: s1 [file s1]

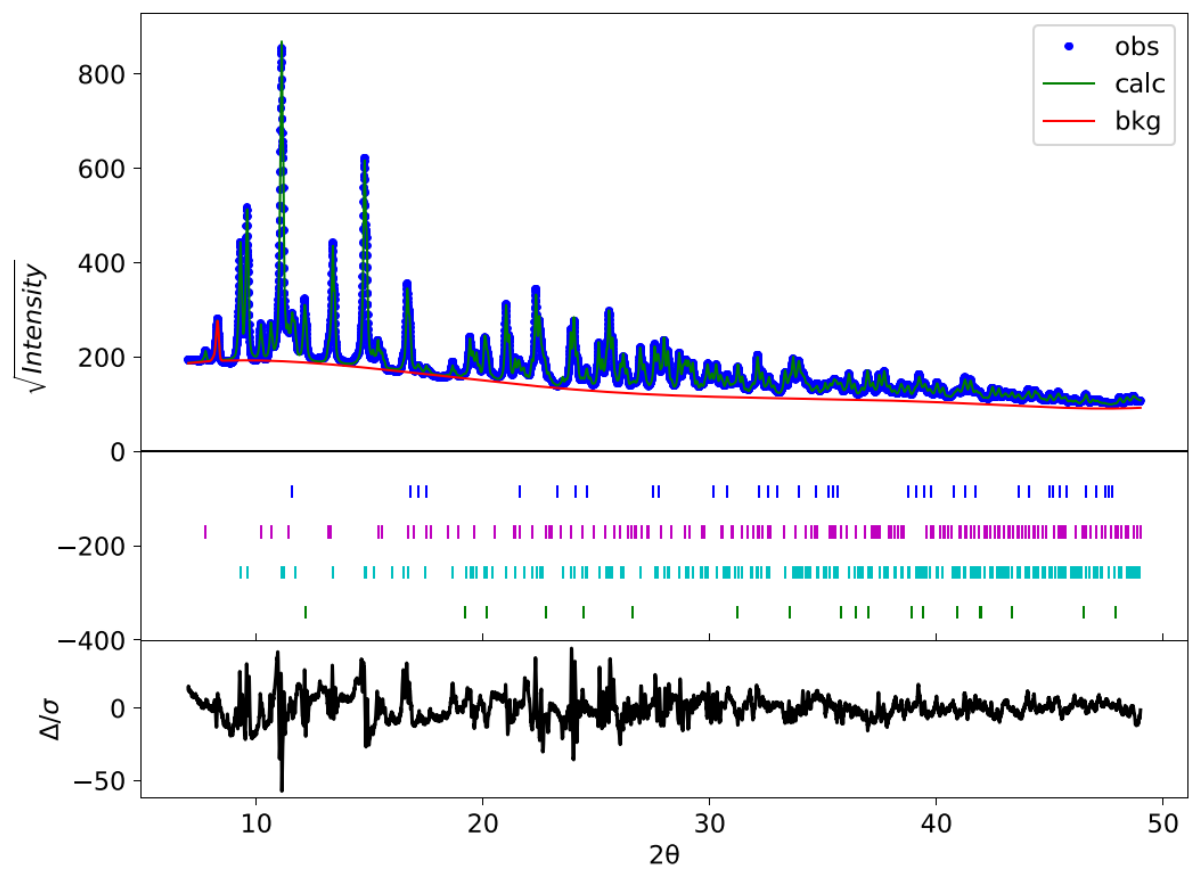

**Figure S4.** Rietveld Fits fresh anode 100 % SoC.

Supplement: s1 [file s1]

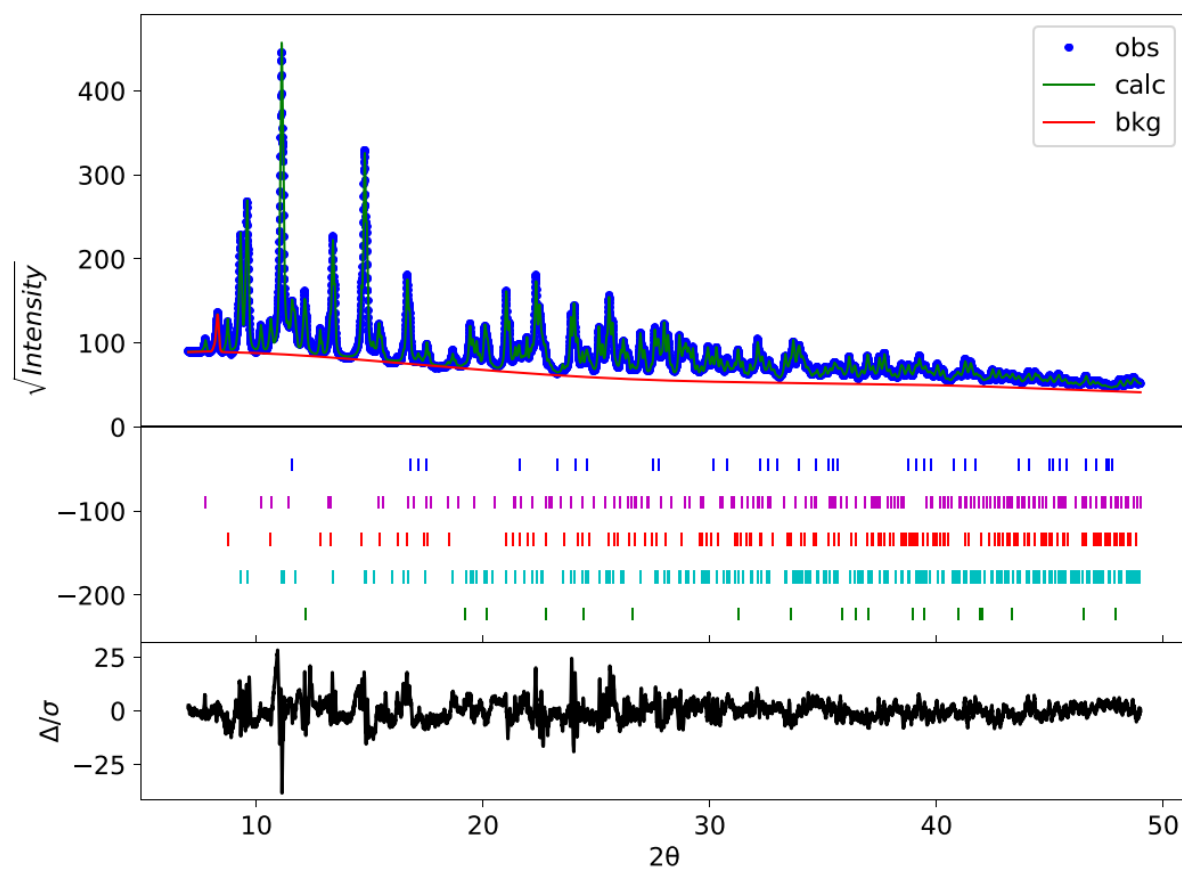

**Figure S8.** Rietveld Fits cycled anode 100 % SoC.

Supplement: s1 [file s1]

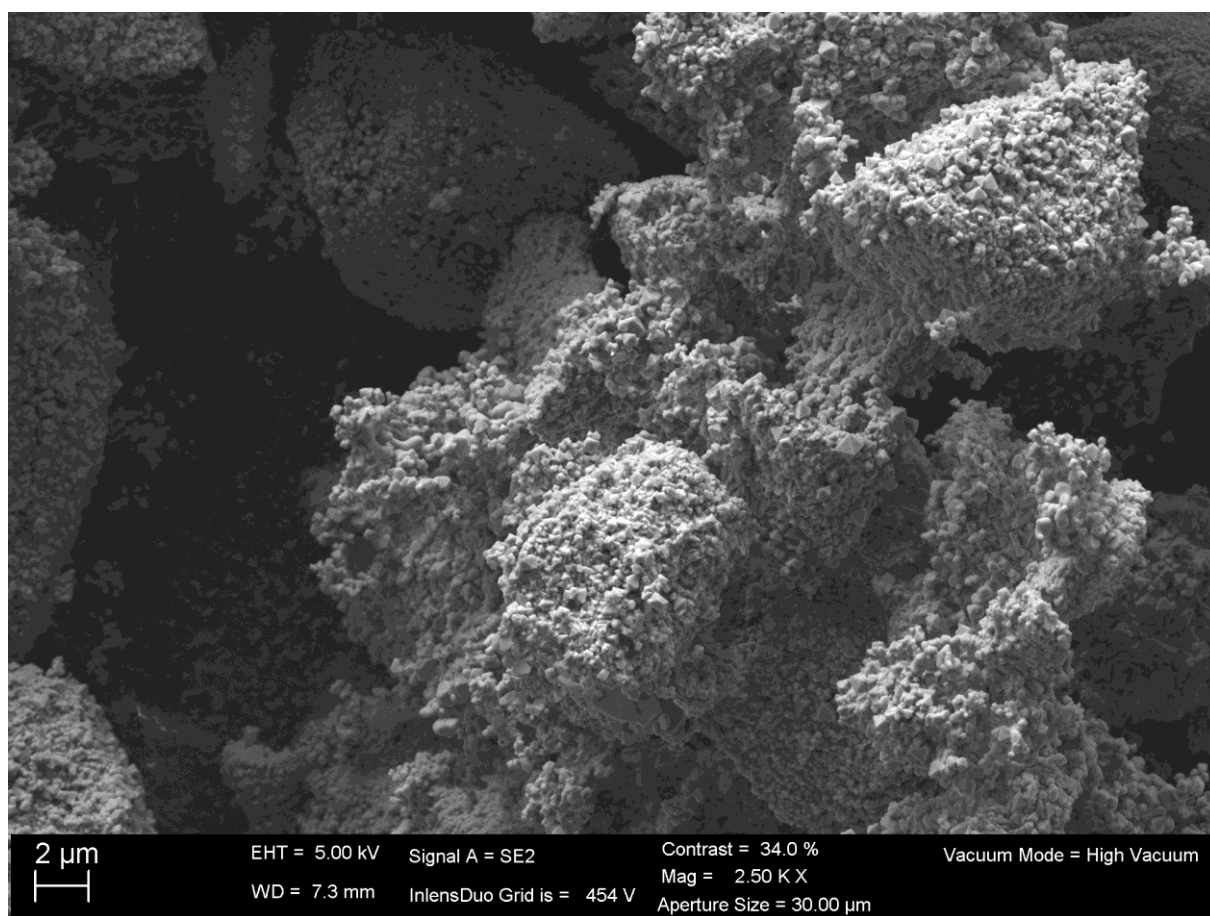

**Figure S10.** SEM-picture of lithium manganese spinel.

Supplement: s1 [file s1]

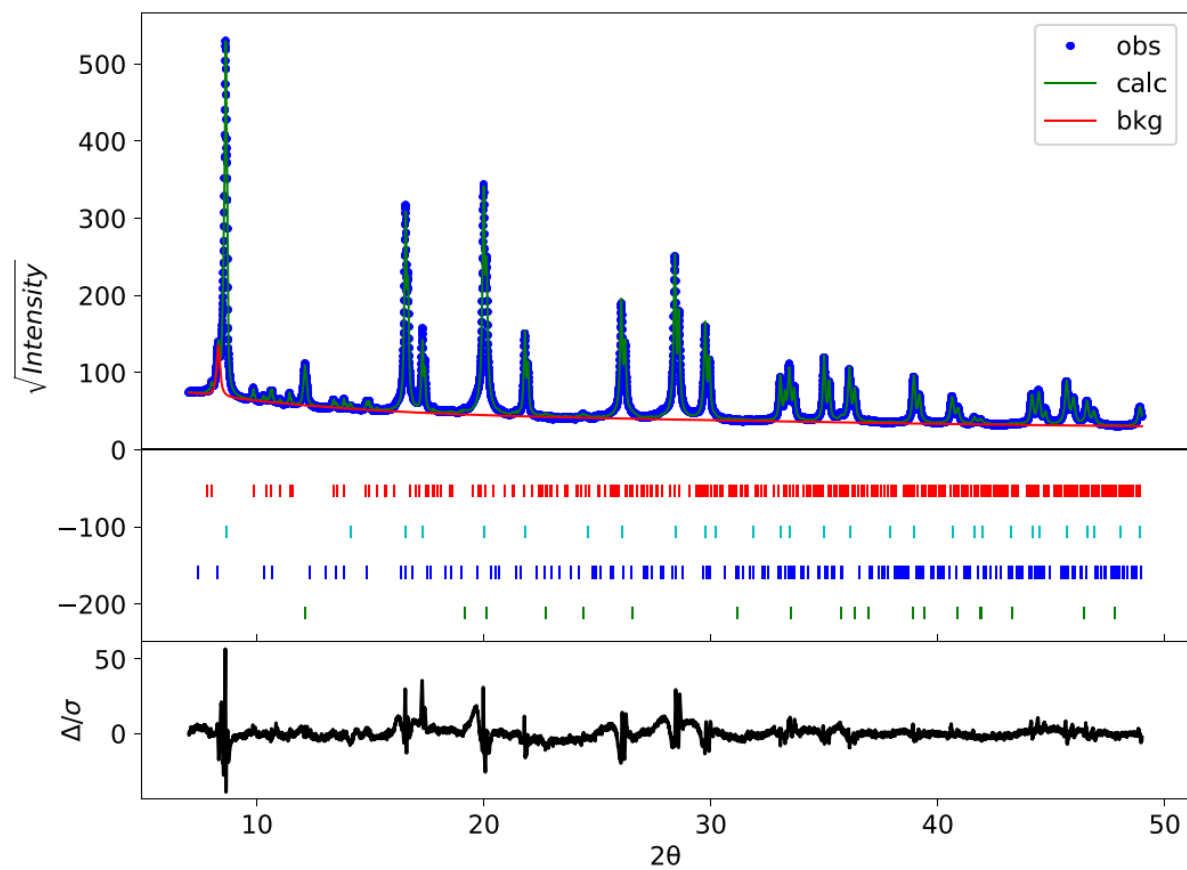

**Figure S3.** Rietveld Fits fresh cathode 100 % SoC.

Supplement: s1 [file s1]

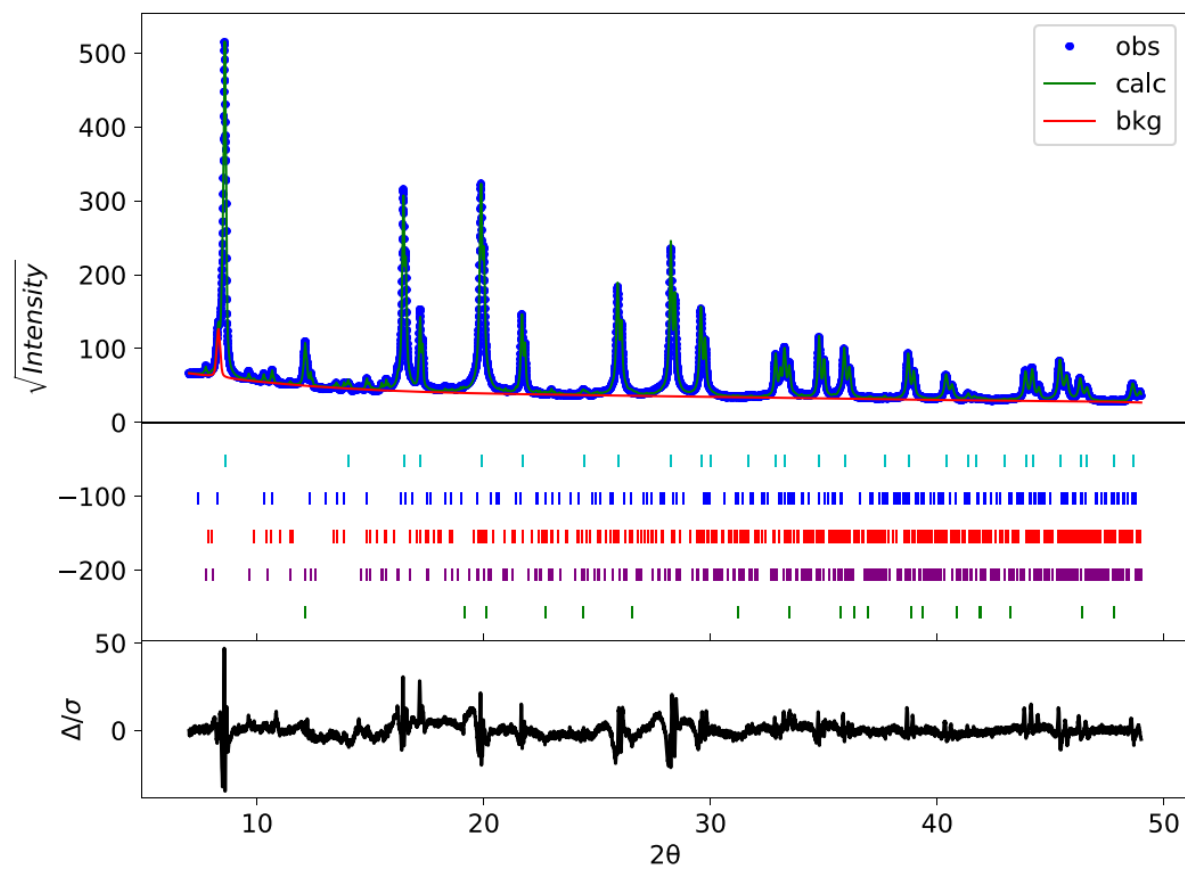

Figure S1. Rietveld Fits fresh cathode 0 % SoC.

Supplement: s1 [file s1 › Figure_S1.pdf]

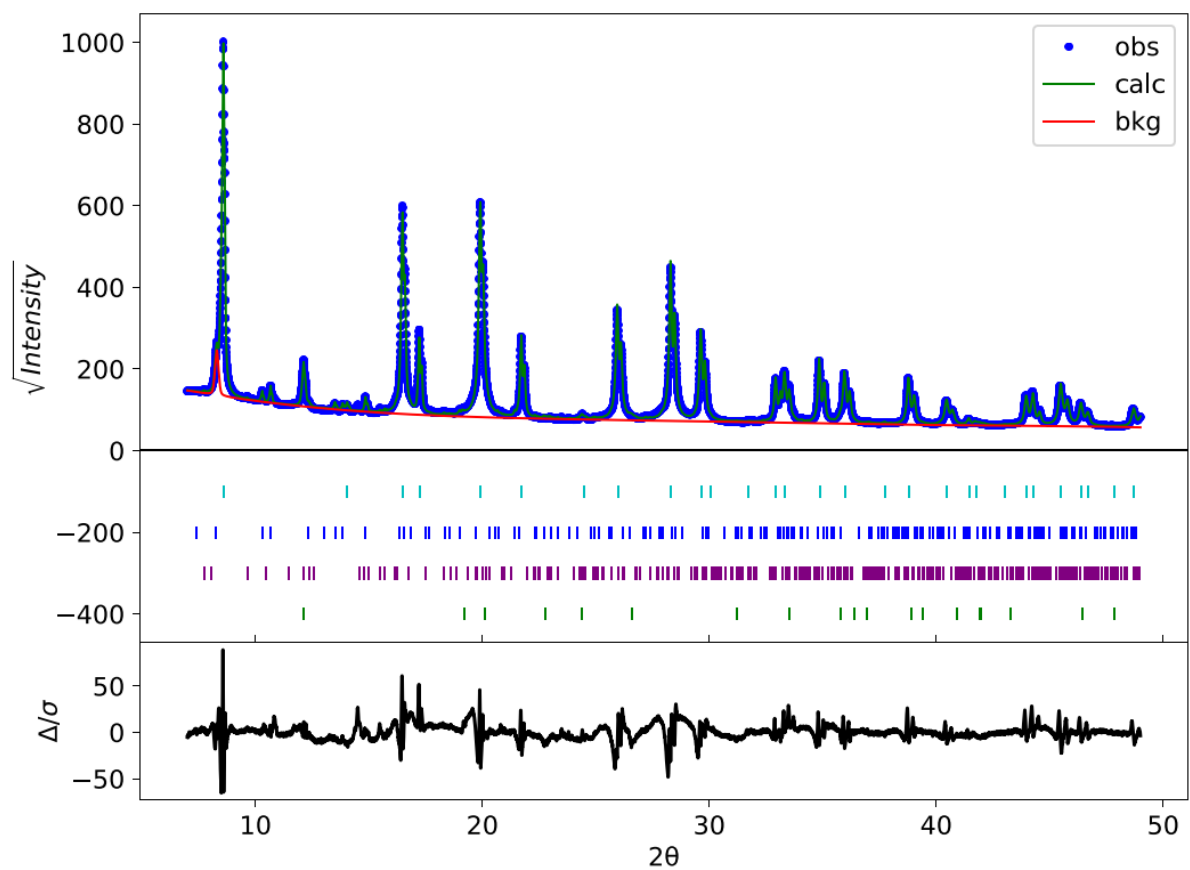

Figure S5. Rietveld Fits cycled cathode 0 % SoC.

Supplement: s1 [file s1 › Figure_S5.pdf]

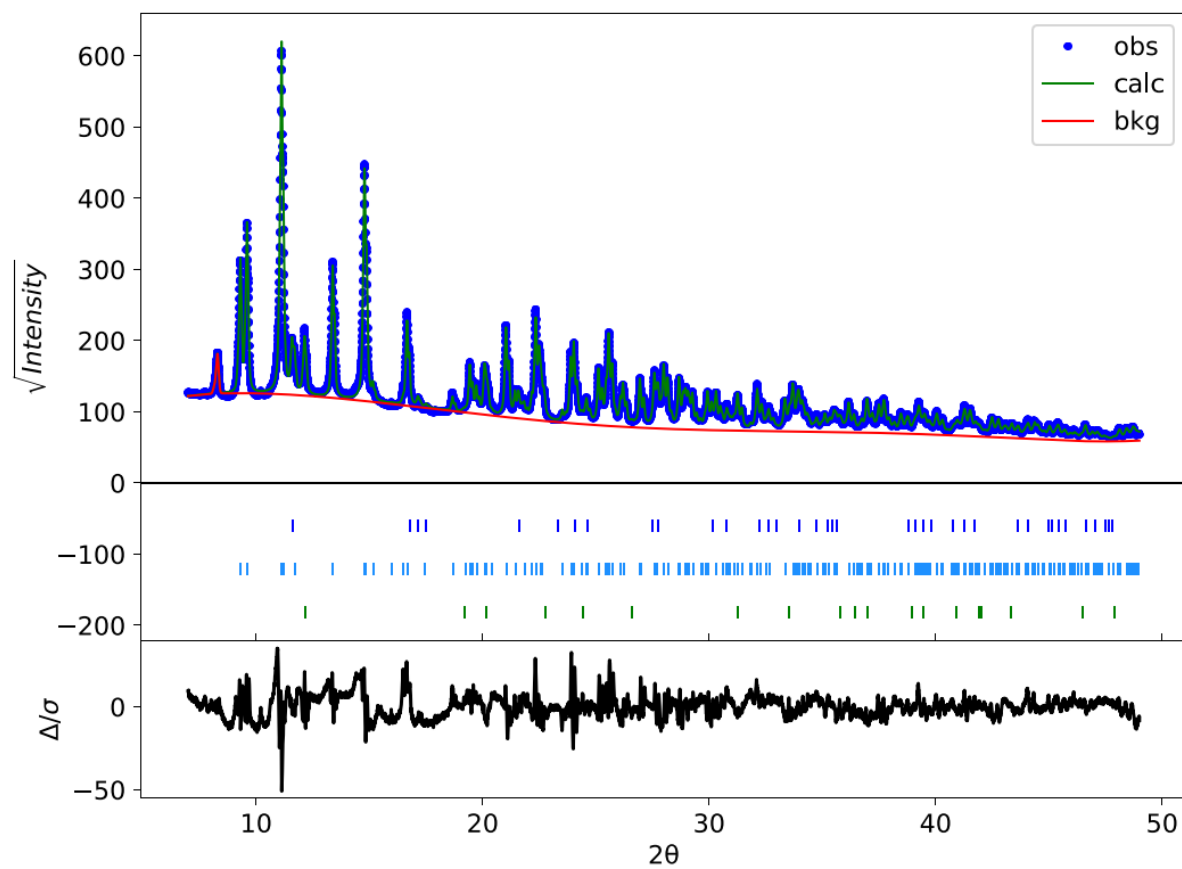

**Figure S6.** Rietveld Fits cycled anode 0 % SoC.

Supplement: s1 [file s1 › Figure_S6.pdf]

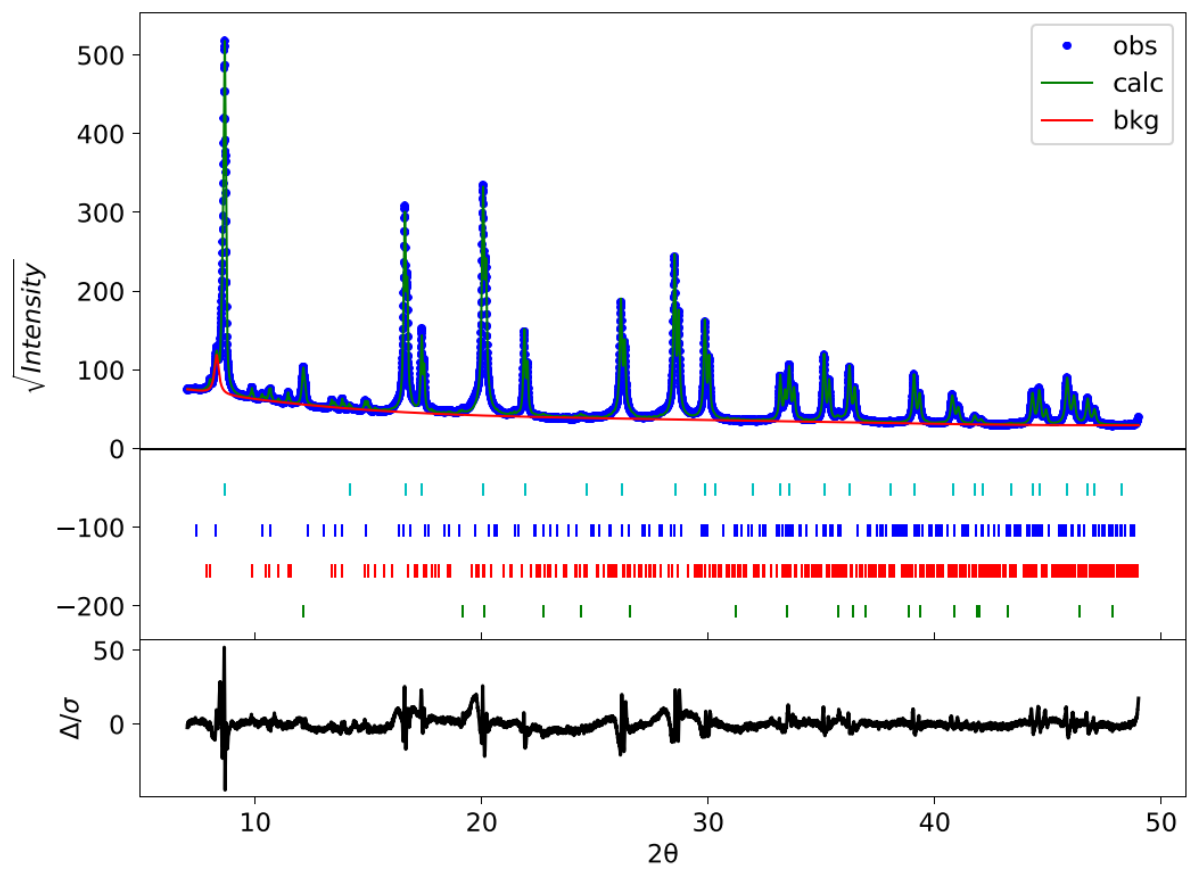

Figure S7. Rietveld Fits cycled cathode 100 % SoC.

Supplement: s1 [file s1 › Figure_S7.pdf]
